# Supplementary material for: Synthesis and characterization of benzo- and naphtho[2,1-b:3,4-b′]dithiophene-containing oligomers for photovoltaic applications
Source: Royal Society of Chemistry journal article supplement (doi:10.1039/c4tc00335g), 2014-01-01
Supplement: c4tc00335g1.pdf [file c4tc00335g1.pdf]

## Supporting information

### Synthesis and Characterization of Benzo- and Naphtho[2,1-b:3,4-b']dithiophene-Containing Oligomers for Photovoltaic Applications

Mirjam Löbert,<sup>a</sup> Amaresh Mishra,<sup>a</sup> Christian Uhrich,<sup>b</sup> Martin Pfeiffer,<sup>b</sup> Peter Bäuerle<sup>a\*</sup>

<sup>a</sup>Institute of Organic Chemistry II and Advanced Materials, University of Ulm, Albert-Einstein-Allee 11, D-89081 Ulm, Germany, Email: [peter.baeuerle@uni-ulm.de](mailto:peter.baeuerle@uni-ulm.de)

<sup>b</sup>Heliatek GmbH, Treidlerstr. 3, 01139 Dresden, Germany

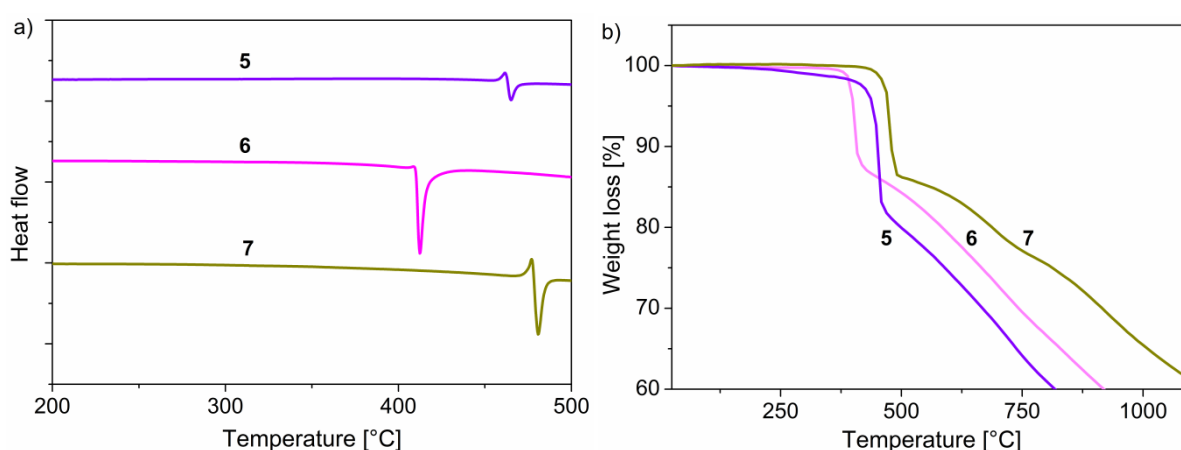

**Figure S1:** (a) TGA curves for oligomers **5-7** measured under nitrogen flow at a heating rate of 10 °C min.; (b) DSC curves measured under argon flow at a heating rate of 10 °C min.

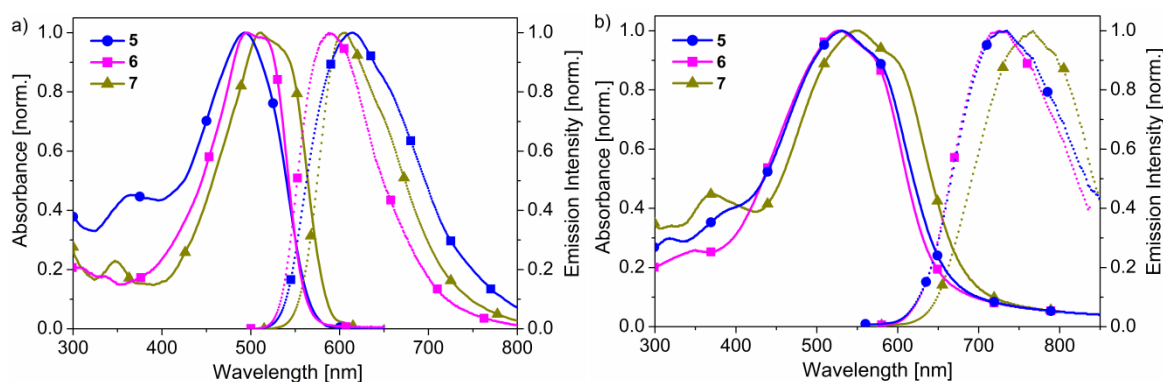

**Figure S2:** (a) Absorption and fluorescence spectra of BDT **5**, **6**, and NDT **7** in dichloromethane at room temperature. (b) Thin film (30 nm) absorbance and fluorescence spectra of **5**, **6** and **7**.

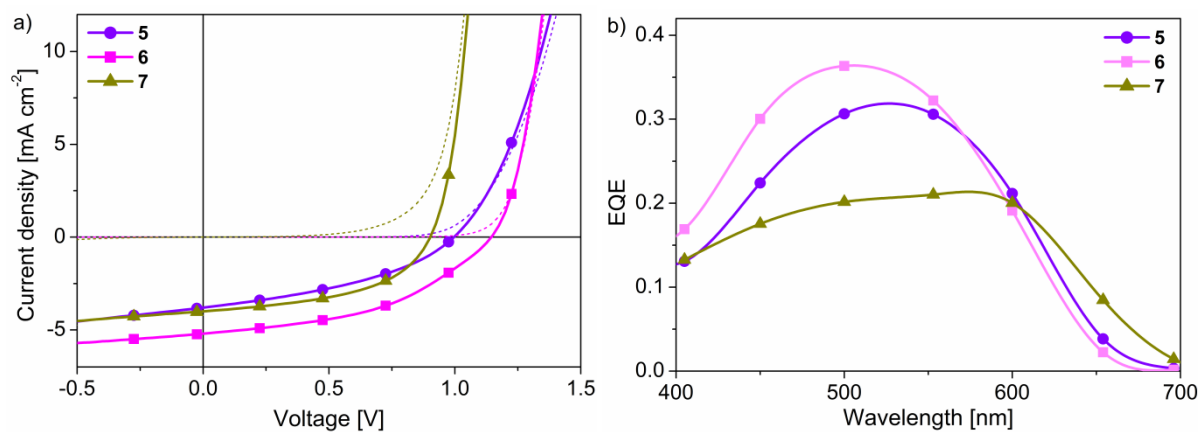

**Figure S3:** (a) *J-V*-characteristics of planar heterojunction solar cells with DCV end-capped oligomers **5-7** as donor material and C<sub>60</sub> as acceptor. (b) Corresponding EQE spectra of PHJ solar cells.
